# Supplementary material
Source: PubMed Central journal article supplement (PMC3021437)
Supplement: 0803577105_Supplemental_PDF.pdf [file 0803577105_Supplemental_PDF.pdf]

# Supporting Information

Smirnova et al. 10.1073/pnas.0803577105

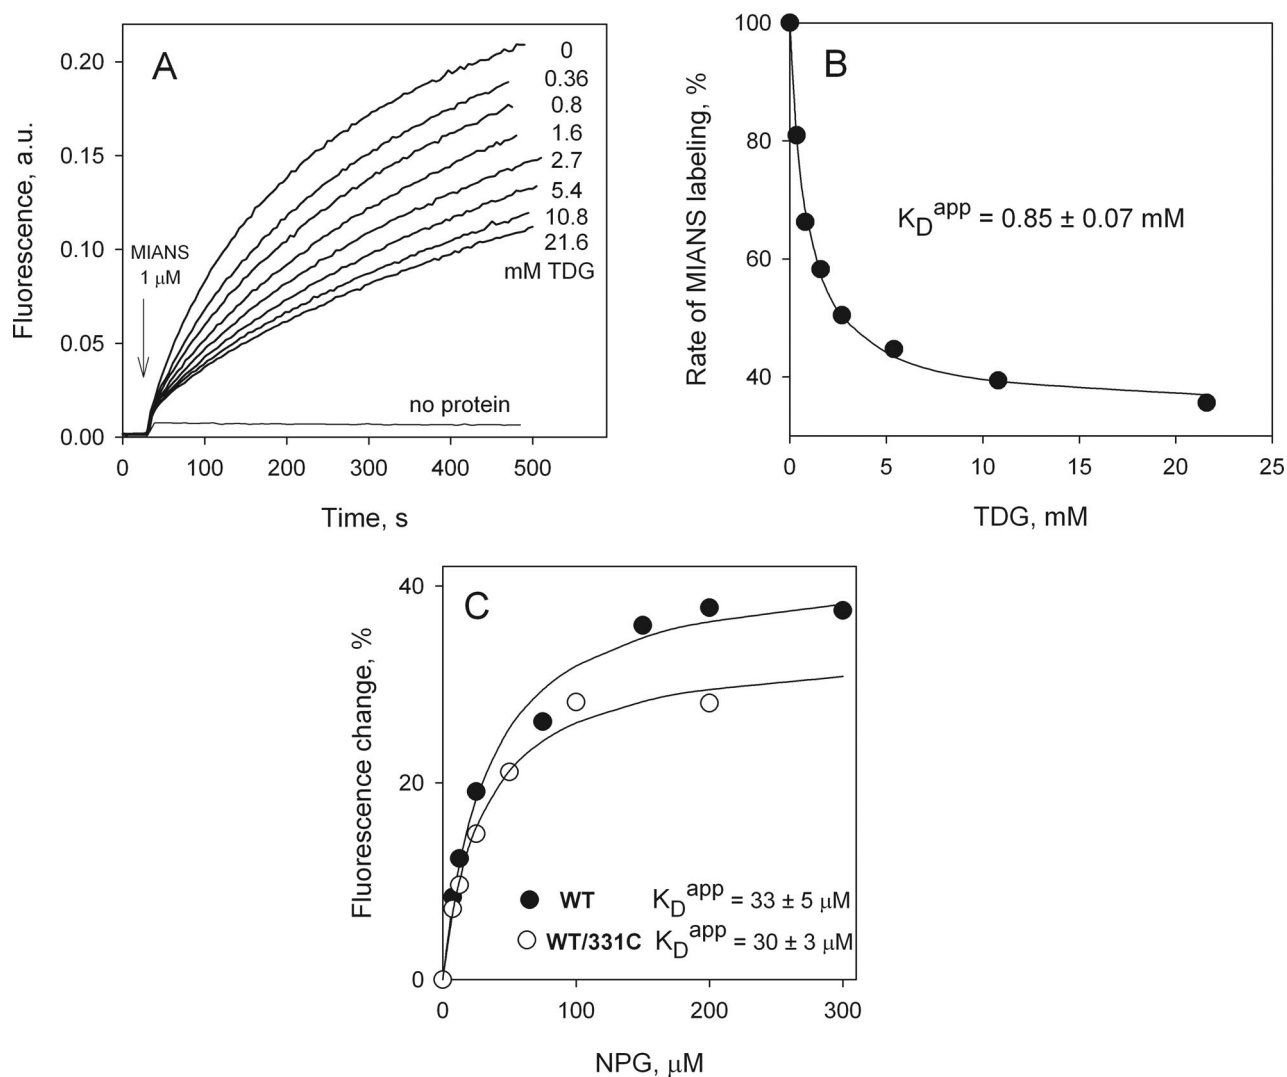

**Fig. S1.** Affinity of purified unlabeled LacY for sugar. (A) TDG affinity measured by TDG protection of Cys-148 against alkylation by MIANS. Rates of wild-type LacY (0.5  $\mu$ M, final concentration) labeling by MIANS at given TDG concentrations were recorded at excitation and emission wavelengths of 330 and 415 nm, respectively, in the 50 mM NaP<sub>i</sub> buffer (pH 7.5), 0.02% DDM. (B) Dependence of initial rates of MIANS labeling (from A) on TDG concentrations. (C) NPG affinity measured for wild-type LacY (●) and for unlabeled V331C/LacY (○) by using the direct sugar binding assay based on Trp→NPG FRET (31). Displacement of NPG at given concentrations with an excess of TDG was detected as change in Trp emission of LacY (0.4  $\mu$ M) in 50 mM NaP<sub>i</sub> (pH 7.5), 0.02% DDM excited at 295 nm. (B and C) Solid lines are hyperbolic fits to the data with estimated  $K_D^{app}$  shown.

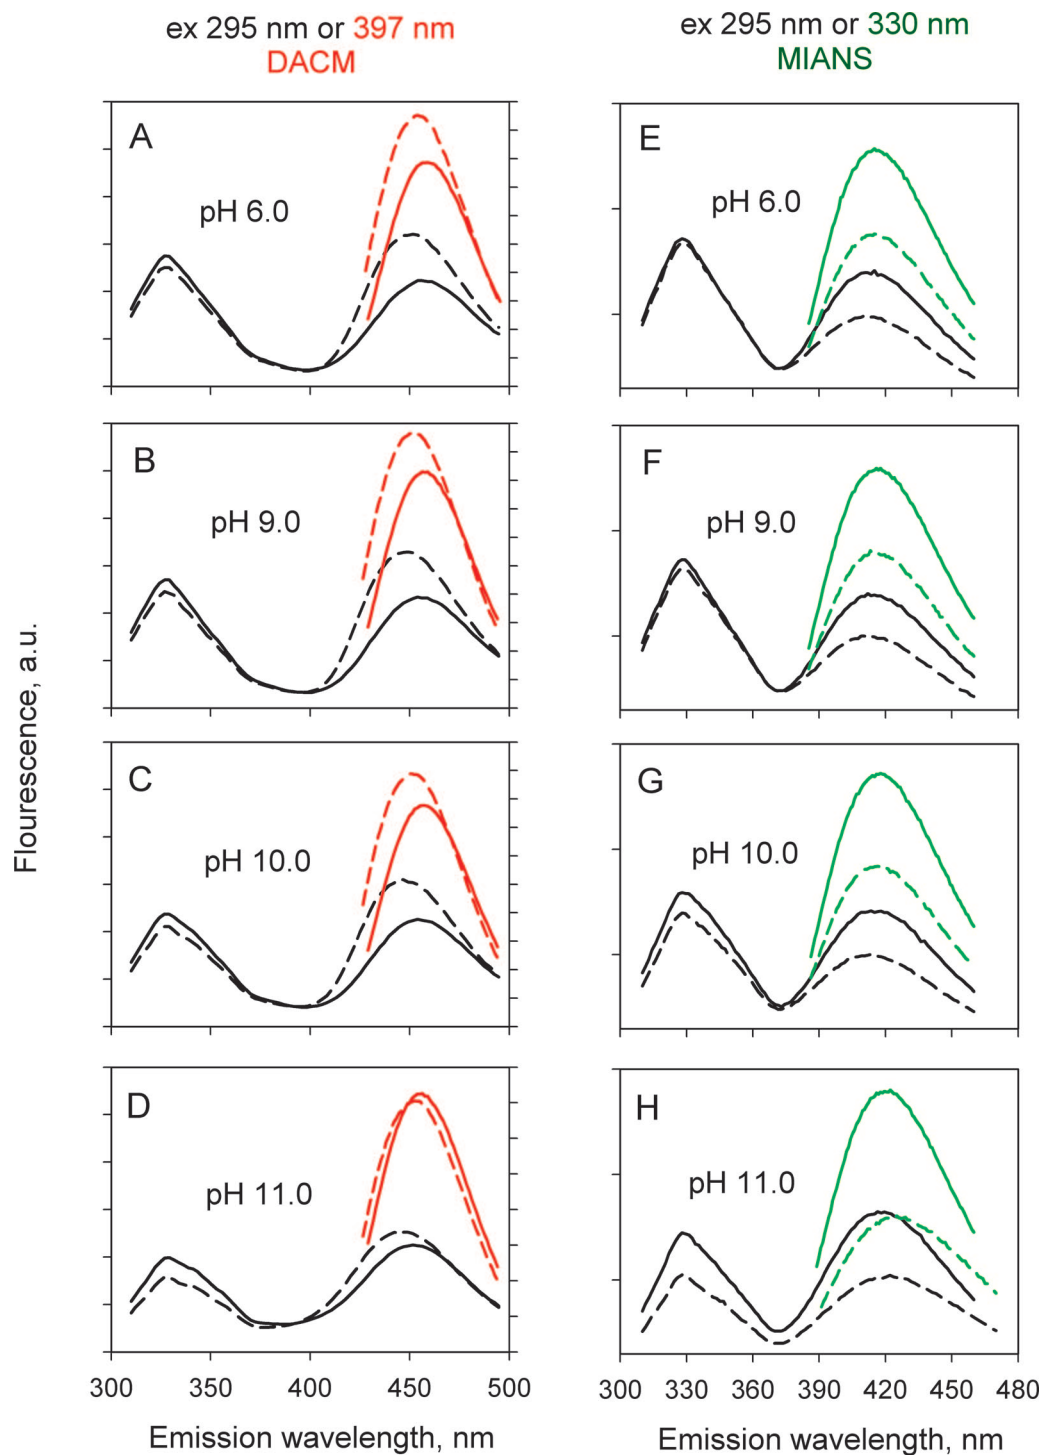

**Fig. S2.** TDG effect on emission spectra of DACM-labeled (A–D) or MIANS-labeled V331C LacY (E–H) at different pH values. Emission spectra were recorded at 0.4  $\mu$ M protein (final concentration) before TDG addition (solid lines) and after adding a saturating TDG concentration (broken lines). Excitation wavelengths are 295 nm (black lines), 397 nm (red lines), and 330 (green lines). Emission maxima are shown for Trp at 330 nm, for DACM at 450 nm, and for MIANS at 415 nm. Vertical scales corresponding to fluorescence intensity are shown with ticks separated by 0.05 arbitrary units. (A–D) The right vertical scales are for DACM fluorescence (excitation 397 nm).





hyperbolic fit:  $pK_a = 10.66$

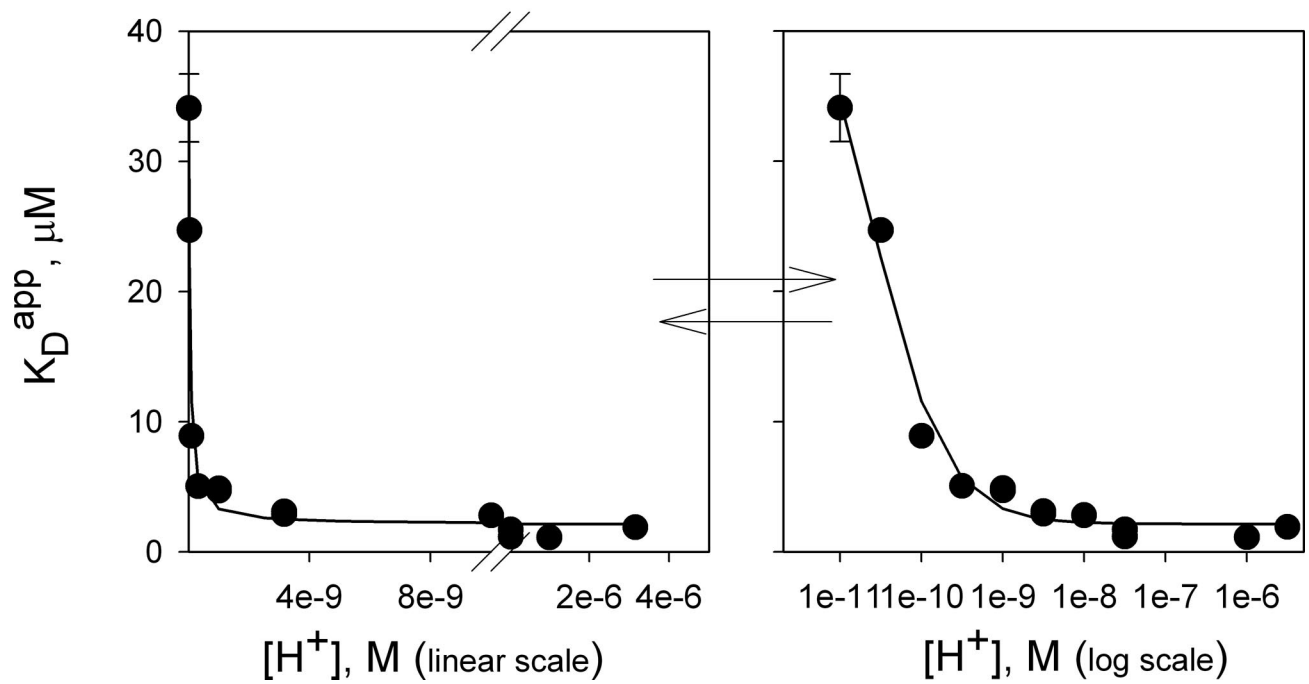

Fig. S5. Affinity of MIANS-labeled V331C LacY for TDG as a function of  $\text{H}^+$  concentration. Data from Fig. S4 (MIANS) are plotted as  $K_D^{app}$  versus  $\text{H}^+$  concentration are shown on linear and log scale. Solid line is a hyperbolic decay fit to the data. The  $pK_a$  value (10.66) is estimated as logarithm of the  $\text{H}^+$  concentration required for half-maximum effect ( $2.188 \times 10^{-11} \text{ M}$ ).

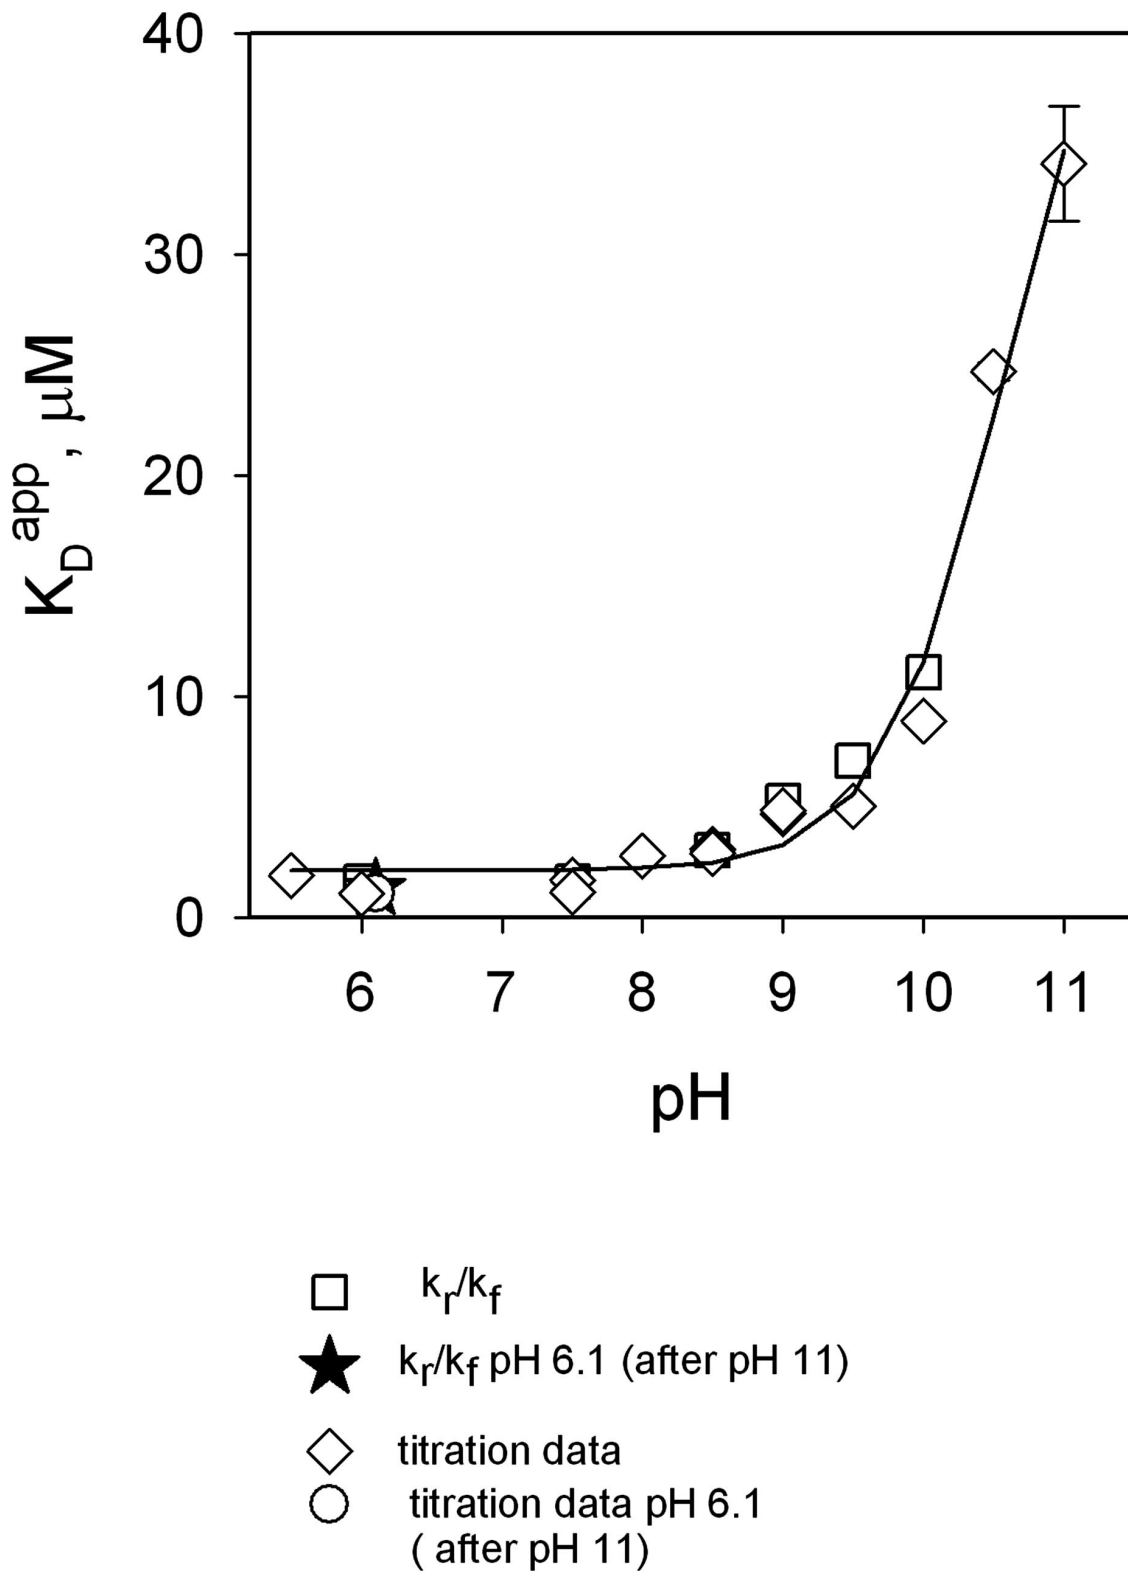

**Fig. S6.**  $K_D^{app}$  values calculated from kinetic parameters and from TDG titrations of MIAN5-labeled V331C LacY at different pH values. Data plotted are  $K_D^{app}$  calculated as  $k_r/k_f$  from kinetic experiments ( $\square$ ) or titration data ( $\diamond$ ).  $\star$ ,  $\circ$ , control experiments for LacY preincubated at pH 11.0 for 12 min and assayed at pH 6.1 in kinetic experiments and TDG titrations, respectively.
